# Supplementary material for: Characterization of Dextran Produced by the Food-Related Strain Weissella cibaria C43-11 and of the Relevant Dextransucrase Gene
Source: MDPI journal article supplement (doi:10.3390/foods11182819), 2022-09-13

## Supplementary Materials

### Characterization of dextran produced by the food-related strain *Weissella cibaria* C43-11 and of the relevant *dextransucrase* gene

Palmira De Bellis <sup>1,\*a</sup>, Massimo Ferrara <sup>1,a</sup>, Anna Rita Bavaro <sup>1</sup>, Vito Linsalata <sup>1</sup>, Mariaelena Di Biase <sup>1</sup>, Biagia Musio<sup>2</sup>, Vito Gallo <sup>2</sup>, Giuseppina Mulè <sup>1</sup> and Francesca Valerio <sup>1</sup>

<sup>1</sup> Institute of Sciences of Food Production (ISPA), National Research Council (CNR), Via G. Amendola 122/O, 70126 Bari, Italy

<sup>2</sup> Dipartimento di Ingegneria Civile, Ambientale, del Territorio, Edile e di Chimica (DICATECh), Politecnico di Bari, via Orabona 4, I-70125, Bari, Italy

\* Correspondence: mirella.debellis@ispa.cnr.it; Tel.: +39-080-5929459; Fax: +39-080-5929374

<sup>a</sup> These authors contributed equally to this work.

**Figure S1.** Typical 1D <sup>1</sup>H NOESY NMR spectra (D<sub>2</sub>O, 400 MHz, 303 K) of free mono- (arabinose, galactose, glucose, fructose, and mannose) and disaccharides (sucrose and maltose), and purified samples from C43-11+S and C2-32+S.

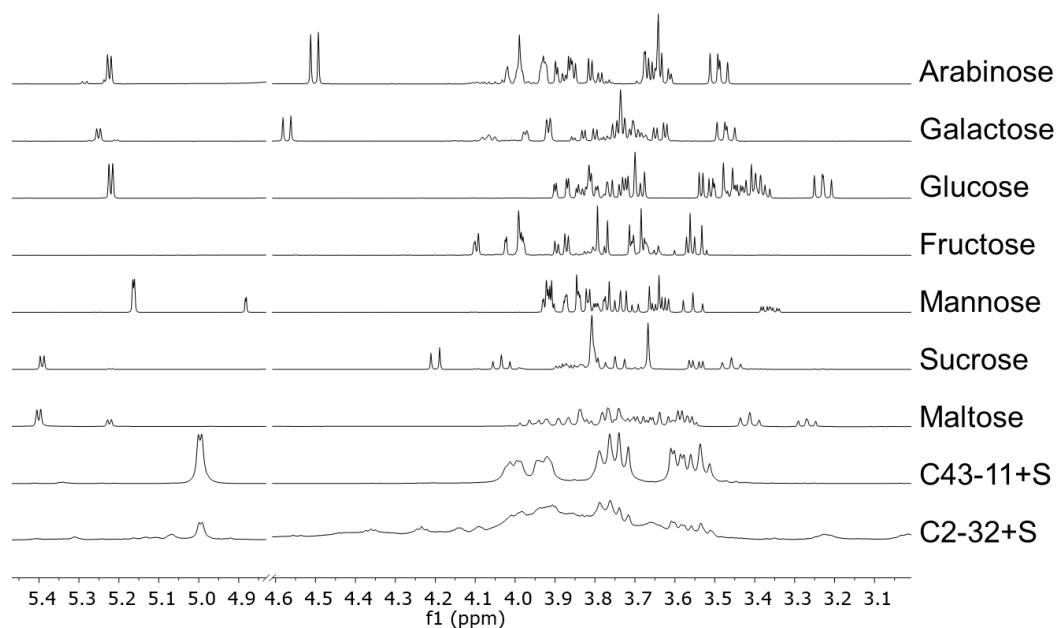

**Figure S2.** Typical 1D  $^1\text{H}$  NOESY NMR spectra ( $\text{D}_2\text{O}$ , 400 MHz, 303 K) of free mono- (arabinose, galactose, glucose, fructose, and mannose) and disaccharides (sucrose and maltose), and purified samples from C43-11+S and C2-32+S.

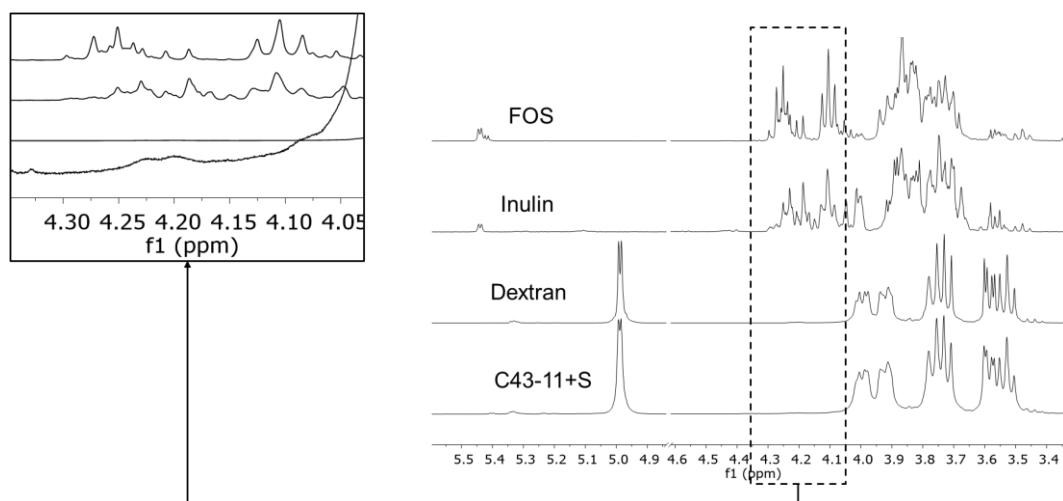

Supplement: s1 [file s1]
